# Supplementary material for: The Role of Adjunctive Exenatide Therapy in Pediatric Type 1 Diabetes
Source: Oxford University Press journal article supplement (doi:10.2337/dc09-1959), 2010-03-23
Supplement: dc091959-sup-onlineappendix.pdf [file dc091959-sup-onlineappendix.pdf]

## ONLINE APPENDIX

### The Role of Adjunctive Exenatide Therapy in Pediatric Type 1 Diabetes

#### Supplemental Material

Vandana S Raman<sup>(1)</sup>, Kimberly J Mason<sup>(1)</sup>, Luisa M Rodriguez<sup>(1)</sup>, Krishnavathana Hassan<sup>(1)</sup>, Xiaoying Yu<sup>(2)</sup>, Lisa Bomgaars<sup>(3)</sup> and Rubina A Heptulla<sup>(1)</sup>.

1. Division of Endocrinology and Metabolism 2. Division of Epidemiology 3. Division of Hematology and Oncology, Department of Pediatrics, Baylor College of Medicine, Houston, TX-77030

#### Pharmacokinetic Sampling:

Patients received 1.25 and 2.5 micrograms of exenatide administered subcutaneously with a minimum 3- week wash out period between studies. Blood samples were collected to determine plasma exenatide concentrations pre-dose, and at 10, 20, 40, 60, 120, 180, 240 and 300 minutes post dosing. Human plasma samples were analyzed for exenatide (synthetic exendin-4) concentrations utilizing a validated Enzyme-Linked Immunosorbent Assay (ELISA). The lower limit of quantification (LLQ) for the assay was 10 pg/ml.

#### Pharmacokinetic Analysis:

Non-compartmental exenatide pharmacokinetic parameters were estimated. The area under the concentration versus time curve ( $AUC_{0-t}$ ) was calculated using the linear trapezoidal rule. . The apparent terminal elimination half-life ( $t_{1/2}$ ) was calculated by  $0.693/k_{el}$  where  $k_{el}$  is the apparent terminal elimination rate constant in patient with terminal concentrations above the LLQ. The clearance (CL) was calculated by dose/AUC. The maximum concentration ( $C_{max}$ ) and time to maximum concentration ( $T_{max}$ ) were obtained directly from the experimental data without interpolation. Plasma pharmacokinetic results are descriptive. For samples below the LLQ, a value of e-99 was used for pharmacokinetic calculations.

#### Results for Pharmacokinetic Analysis

For the 1.25 mcg and 2.5 mcg doses the  $AUC_{5h}$  were  $8321 \pm 1561$  and  $12801 \pm 4927$  pg-min/ml ( mean  $\pm$  SD), respectively. The mean half-life ( $t_{1/2}$ ) and  $T_{max}$  did not appear to be significantly affected by dose with mean ranges of 85-91 and 98-112 minutes respectively. There was a dose response seen in  $C_{max}$  and AUC.
